# Supplementary material
Source: PubMed Central journal article supplement (PMC4775904)
Supplement: SD11.pdf [file SD11.pdf]

|                |                          |
|----------------|--------------------------|
| Alcohol        | <input type="checkbox"/> |
| Immersion Oil  | <input type="checkbox"/> |
| Buffered water | <input type="checkbox"/> |

|                                                                                                         |                                                                                                                                                                                  |
|---------------------------------------------------------------------------------------------------------|----------------------------------------------------------------------------------------------------------------------------------------------------------------------------------|
| 11. If it has reagents, how frequently are they re-supplied?                                            | <input type="checkbox"/> Weekly<br><input type="checkbox"/> Monthly<br><input type="checkbox"/> Quarterly<br><input type="checkbox"/> Annually<br><input type="checkbox"/> Other |
| 12. When was the last request for equipment supplies (reagents, gloves, slides, lancets, cotton, etc.)? | Date: _____<br>Of what: _____                                                                                                                                                    |
| 13. When was the last equipment supply received?                                                        | <b>Review the Supply Guide</b><br>Date: _____                                                                                                                                    |
| 14. How are reagents requested when lacking?                                                            | <b>Write the answer:</b>                                                                                                                                                         |
|                                                                                                         | Who makes the request:                                                                                                                                                           |
|                                                                                                         | To whom is the request sent:                                                                                                                                                     |
|                                                                                                         | Who receives the supplies:                                                                                                                                                       |
|                                                                                                         | Do you buy your own supplies? (Which)                                                                                                                                            |
| 15. Does it have slides?                                                                                | <input type="checkbox"/> Yes <input type="checkbox"/> No                                                                                                                         |
| 16. If so, how many?                                                                                    | <b>Write the answer:</b>                                                                                                                                                         |
| 17. Do you buy your own slides?                                                                         | <input type="checkbox"/> Yes <input type="checkbox"/> No                                                                                                                         |
| 18. If they have slides, are they good quality?                                                         | <input type="checkbox"/> Yes <input type="checkbox"/> No                                                                                                                         |
| 19. Do they have immersion oil?                                                                         | <input type="checkbox"/> Yes <input type="checkbox"/> No                                                                                                                         |

|                                                                  |                                                          |                                                          |  |
|------------------------------------------------------------------|----------------------------------------------------------|----------------------------------------------------------|--|
| <b>Evaluate the lab apparatus:</b>                               |                                                          |                                                          |  |
| 20. Do they have the capacity to perform other type of analysis? | <input type="checkbox"/> Yes <input type="checkbox"/> No |                                                          |  |
| 21. If so, which are they?                                       | RPR/Syphilis/ VDRL                                       | <input type="checkbox"/> Yes <input type="checkbox"/> No |  |
|                                                                  | Widal/Typhoid                                            | <input type="checkbox"/> Yes <input type="checkbox"/> No |  |
|                                                                  | Haemoglobin                                              | <input type="checkbox"/> Yes <input type="checkbox"/> No |  |
|                                                                  | Hematocrit                                               | <input type="checkbox"/> Yes <input type="checkbox"/> No |  |
|                                                                  | Glucose                                                  | <input type="checkbox"/> Yes <input type="checkbox"/> No |  |
|                                                                  | Urine                                                    | <input type="checkbox"/> Yes <input type="checkbox"/> No |  |
|                                                                  | Feces                                                    | <input type="checkbox"/> Yes <input type="checkbox"/> No |  |
|                                                                  | HIV                                                      | <input type="checkbox"/> Yes <input type="checkbox"/> No |  |
|                                                                  | Speed Sediment                                           | <input type="checkbox"/> Yes <input type="checkbox"/> No |  |
|                                                                  | Haemogram                                                | <input type="checkbox"/> Yes <input type="checkbox"/> No |  |
|                                                                  | FL                                                       | <input type="checkbox"/> Yes <input type="checkbox"/> No |  |
|                                                                  | Hepatitis B                                              | <input type="checkbox"/> Yes <input type="checkbox"/> No |  |
|                                                                  | Blood Group                                              | <input type="checkbox"/> Yes <input type="checkbox"/> No |  |
|                                                                  | Tuberculosis                                             | <input type="checkbox"/> Yes <input type="checkbox"/> No |  |
|                                                                  | Rapid Pregnancy Test                                     | <input type="checkbox"/> Yes <input type="checkbox"/> No |  |
|                                                                  | Others _____                                             |                                                          |  |

|                                                                       |          |    |  |
|-----------------------------------------------------------------------|----------|----|--|
| <b>Revise the parasitological density and malaria quantification:</b> |          |    |  |
| 22. Which method are you using?                                       | 500 x C  |    |  |
|                                                                       | 8000 x C |    |  |
| 23. Do they have a cell counter?                                      | Yes      | No |  |

**Monitor the reagent preparation (Giemsa) – Comments:**

**Monitor the collection, identification, fixation, and colouring - Comments:**  
(If there are no reagents for preparation, explain the process)

**Monitor the technique for seeking plasmodium in the slides - Comments:**

**Review 3 slides brought by the supervisor (1 positive/1 negative/1 artefact).** (Remember not to inform the technicians the type of slide being read!)

|                                       |     |    |  |
|---------------------------------------|-----|----|--|
| 24. Correctly identified as positive? | Yes | No |  |
| 25. Correctly identified as negative? | Yes | No |  |
| 26. Correctly identified as artifact? | Yes | No |  |

**Review 10 slides done by the lab technicians for quality control. The supervisor must then take these slides and substitute with new slides!** (5 positive for malaria and 5 negative for malaria if possible)

|                                                    |               |  |
|----------------------------------------------------|---------------|--|
| 27. How many are correctly identified as positive? | _____ / _____ |  |
| 28. How many are correctly identified as negative? | _____ / _____ |  |

**Review the RDTs:**

|                                             |     |    |  |
|---------------------------------------------|-----|----|--|
| 29. Do lab technicians perform RDTs?        | Yes | No |  |
| 30. Can they correctly explain the process? | Yes | No |  |

**Monitor the measure of haematocrit and haemoglobin:**

|                                                                                 |                   |                   |  |
|---------------------------------------------------------------------------------|-------------------|-------------------|--|
| 31. Do the lab technicians perform a haemoglobin test?                          | Yes               | No                |  |
| 32. If so, do they measure haemoglobin directly or do they measure haematocrit? | _____ Haemoglobin | _____ Haematocrit |  |

|                                                                                                                                             |                                                          |  |
|---------------------------------------------------------------------------------------------------------------------------------------------|----------------------------------------------------------|--|
| 33. If they measure haematocrit, can the technicians correctly explain the right formula to calculate the haemoglobin from the haematocrit? | <input type="checkbox"/> Yes <input type="checkbox"/> No |  |
|---------------------------------------------------------------------------------------------------------------------------------------------|----------------------------------------------------------|--|

|                                                                       |                                                          |  |
|-----------------------------------------------------------------------|----------------------------------------------------------|--|
| <b>Review biosecurity:</b>                                            |                                                          |  |
| 34. Can the technicians correctly explain the meaning of biosecurity? | <input type="checkbox"/> Yes <input type="checkbox"/> No |  |
| 35. Do technicians have boxes for needles?                            | <input type="checkbox"/> Yes <input type="checkbox"/> No |  |
| 36. If so, do they use them?                                          | <input type="checkbox"/> Yes <input type="checkbox"/> No |  |
| 37. Do technicians have gloves?                                       | <input type="checkbox"/> Yes <input type="checkbox"/> No |  |
| 38. If so, do technicians use gloves?                                 | <input type="checkbox"/> Yes <input type="checkbox"/> No |  |
| <b>Comment on the general biosecurity conditions:</b>                 |                                                          |  |
|                                                                       |                                                          |  |

|                                                                                                                                    |                                                                                                   |  |
|------------------------------------------------------------------------------------------------------------------------------------|---------------------------------------------------------------------------------------------------|--|
| <b>STATISTICAL DATA</b>                                                                                                            |                                                                                                   |  |
| <b>Review the laboratory book and monthly report from the previous month</b>                                                       |                                                                                                   |  |
| 39. Which of the means are they using to report statistical data?                                                                  | <input type="checkbox"/> Book<br><input type="checkbox"/> Report<br><input type="checkbox"/> Both |  |
| 40. Write down the number of slides checked the previous month (with the data from book/report):<br>Total _____                    |                                                                                                   |  |
| 41. Write down the total number of positive slides checked the previous month (with the data from the book/report):<br>Total _____ |                                                                                                   |  |
| 42. Are the technicians performing RDTs in the lab?                                                                                | <input type="checkbox"/> Yes <input type="checkbox"/> No                                          |  |
| <b>If they perform RDTs, review the lab book and last month's lab report</b>                                                       |                                                                                                   |  |
| 43. Write down the total number of RDTs performed last month (with the data from the book/ report):<br>Total _____                 |                                                                                                   |  |
| 44. Write down the number of positive RDTs from last month (with the data from the book/ report):<br>Total _____                   |                                                                                                   |  |

**“Problems and Solutions” Frame:**

|                                                                                     |
|-------------------------------------------------------------------------------------|
| <p><b>Were the recommendations from the last supervision solved? Elaborate.</b></p> |
|-------------------------------------------------------------------------------------|

| Main Problems<br>This Visit | Suggested solutions/ how much more<br>training is needed | Responsible | Term |
|-----------------------------|----------------------------------------------------------|-------------|------|
|                             |                                                          |             |      |

===== *cut here* =====

**A copy must be filled and left with the person responsible for the Health Unit at the end of the visit:**

Date of Visit: \_\_\_\_/\_\_\_\_/\_\_\_\_ Supervisor's Name: \_\_\_\_\_

| Main Problems<br>This Visit | Suggested solutions/ how much more<br>training is needed | Responsible | Term |
|-----------------------------|----------------------------------------------------------|-------------|------|
|                             |                                                          |             |      |
